# Supplementary material for: Involving the general practitioner during curative cancer treatment: a systematic review of health care interventions
Source: PubMed Central journal article supplement — BMJ Open. 2019 Apr 14;9(4):e026383. doi: 10.1136/bmjopen-2018-026383 (PMC6500297; doi:10.1136/bmjopen-2018-026383), 2019-04-14
Supplement: bmjopen-2018-026383supp001.pdf [file bmjopen-2018-026383supp001.pdf]

interdisciplinary[Title/Abstract]) OR multidisciplinary[Title/Abstract]) OR "liaison nurse\*[Title/Abstract]) OR "health care planning"[Title/Abstract]) OR "health care management"[Title/Abstract]) OR "community health planning"[Title/Abstract]) OR "service integration"[Title/Abstract]) OR "services integration"[Title/Abstract]) OR "professional-patient relations"[Title/Abstract]) OR "professional-family relations"[Title/Abstract]) OR "shared services"[Title/Abstract])) OR "multi professional working"[Title/Abstract]) OR interprofessional[Title/Abstract]) OR "multi agency working"[Title/Abstract]) OR "inter agency working"[Title/Abstract]) OR "case management"[Title/Abstract]) OR "patient discharge"[MeSH Terms]) OR "patient care planning"[MeSH Terms]) OR "patient care team"[MeSH Terms]) OR "continuity of patient care"[MeSH Terms]) OR "patient-centered care"[MeSH Terms]) OR "case management"[MeSH Terms]) OR "community health planning"[MeSH Terms]) OR "delivery of health care, integrated"[MeSH Terms]) OR "professional-patient relations"[MeSH Terms]) OR "interprofessional relations"[MeSH Terms]) OR "professional-family relations"[MeSH Terms]) OR "cooperative behavior"[MeSH Terms])

#4 (((("randomized controlled trial"[Publication Type]) OR random\*[Title/Abstract]) OR control\*[Title/Abstract]) OR intervention\*[Title/Abstract]))

Combining search terms: #1 AND #2 AND #3 AND #4

## Syntax EMBASE

#1

'primary care':ab,ti OR 'primary health care':ab,ti OR 'primary medical care':ab,ti OR 'first-contact medical care':ab,ti OR 'first line care':ab,ti OR 'primary care physician':ab,ti OR 'primary care physicians':ab,ti OR 'general practitioner':ab,ti OR 'general practitioners':ab,ti OR gp:ab,ti OR gps:ab,ti OR g.p.:ab,ti OR 'gp organised':ab,ti OR 'gp organized':ab,ti OR 'family doctor':ab,ti OR 'family doctors':ab,ti OR 'family practice':ab,ti OR 'family practices':ab,ti OR 'primary health care'/exp OR 'primary health care' OR 'general practice'/exp OR 'general practice'

#2

oncology:ab,ti OR cancer:ab,ti OR malignancy:ab,ti OR carcinoma:ab,ti OR (tumor:ab,ti AND malignant:ab,ti) OR ('neoplasm'/exp OR neoplasm AND malignant:ab,ti) OR 'malignant neoplastic disease'/exp OR 'malignant neoplastic disease'

#3

care:ab,ti OR continu\*:ab,ti OR 'follow up':ab,ti OR surveillance:ab,ti OR 'discharging plan':ab,ti OR 'discharge plan':ab,ti OR 'discharge planning':ab,ti OR 'patient discharge':ab,ti OR 'hospital discharge':ab,ti OR transmural:ab,ti OR collaborative:ab,ti OR interdisciplinary:ab,ti OR multidisciplinary:ab,ti OR 'liaison nurse':ab,ti OR 'health care planning':ab,ti OR 'health care management':ab,ti OR 'community health planning':ab,ti OR 'service integration':ab,ti OR 'services integration':ab,ti OR 'professional-patient relations':ab,ti OR 'professional-family relations':ab,ti OR 'shared services':ab,ti OR 'shared notes':ab,ti OR 'multi professional working':ab,ti OR interprofessional:ab,ti OR 'multi agency working':ab,ti OR 'inter agency working':ab,ti OR 'case management':ab,ti OR 'patient care'/exp OR 'integrated health care system' OR 'health care planning'/exp

#4

'randomized controlled trial'/exp OR random\*:ab,ti OR control\*:ab,ti OR  
intervention\*:ab,ti

Combining search terms: #1 AND #2 AND #3 AND #4
